# Supplementary material
Source: PubMed Central journal article supplement (PMC1635345)
Supplement: mbc_E06-01-0035_1.pdf [file mbc_E06-01-0035_1.pdf]

**Table S1**

| <i>Accession No</i>  | <i>Organism</i>               | <i>Abbreviation</i> | <i>Sequence</i> | <i>Length</i> |
|----------------------|-------------------------------|---------------------|-----------------|---------------|
| CA389381             | H. sapiens                    | Hsa                 | Partial EST     | -             |
| BC030555             | H. sapiens                    | Hsa                 | cDNA            | 490           |
| P07106               | B. taurus                     | Bta                 | Protein         | 533           |
| XM_237252            | R. norvegus                   | Rno                 | cDNA            | 554           |
| AK005001             | M. musculus                   | Mmu                 | cDNA            | 473           |
| TC28717              | G. gallus <sup>1</sup>        | Gga                 | EST             | -             |
| CF216920             | S. tropicalis                 | Str                 | EST             | -             |
| BG409523             | X. laevis                     | Xla                 | EST             | -             |
| CA354989             | O. mykiss                     | Omy                 | EST             | -             |
| AW422493             | D. renio                      | Dre                 | EST             | -             |
| SINFRUG00000122689   | T. rubripes <sup>2</sup>      | Tru                 | Pred. ORF       | 398           |
| BC029164             | H. sapiens                    | Hsa                 | cDNA            | 305           |
| BC048371             | M. musculus                   | Mmu                 | cDNA            | 329           |
| XM_221005            | R. norvegus                   | Rno                 | Protein         | 338           |
| TC13206              | A. gambie <sup>1</sup>        | Aga                 | Protein         | 319           |
| BX550023             | G. morsitans                  | Gmo                 | Partial EST     | -             |
| NM_134885            | D. melanogaster               | Dme                 | cDNA            | 324           |
| Contig4092_Contig573 | D. pseudoobscura <sup>3</sup> | Dps                 | Pred. ORF       | 318           |
| AK112135             | C. intestinalis               | Cin                 | cDNA            | 367           |
| CBG13297             | C. briggsae                   | Cbr                 | Pred. ORF       | 280           |
| NM_067130            | C. elegans                    | Cel                 | cDNA            | 266           |
| CB175137             | A. ceylanium                  | Ace                 | Partial EST     | -             |

All the BLAST searches were conducted using non-redundant nucleotide or protein databases, EST databases, contig databases from the following sites: NCBI (<http://www.ncbi.nlm.nih.gov/BLAST/>), 1) The Institute for Genomic Research (TIGR) (<http://tigrblast.tigr.org/tgi/>), 2) The Sanger Institute, (<http://www.sanger.ac.uk/DataSearch/>), 3) Human Genome Sequencing Center, Baylor College of Medicine, (<http://www.hgsc.bcm.tmc.edu/>).

**Figure S1**

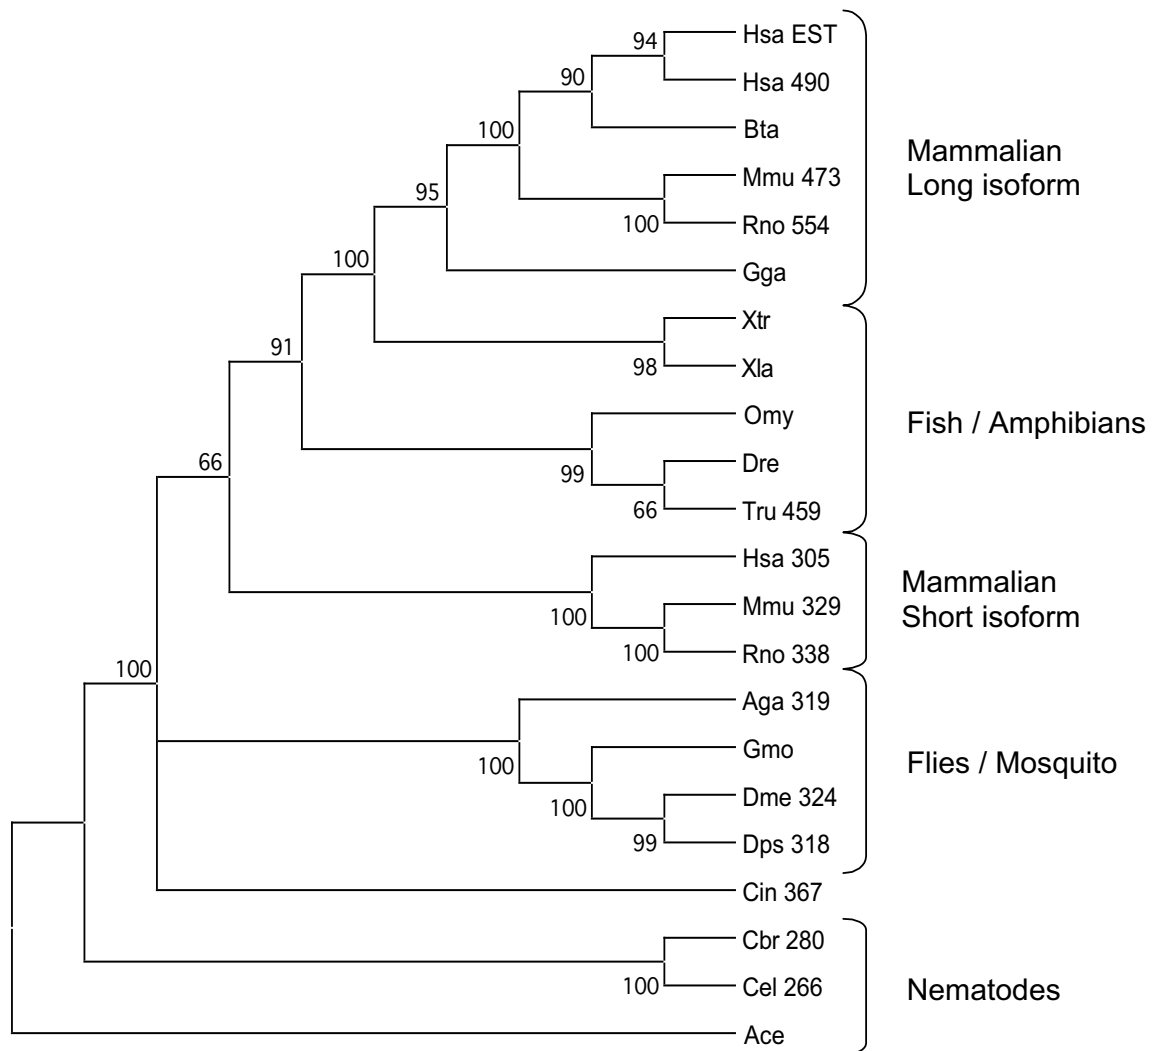

## Methods

**Alignments:** The sequences used for phylogenetic analysis were aligned using CLUSTALX v. 1.82. The protein alignments were conducted with the Gonnet matrix.

**Construction of the phylogenetic trees:** Rooted neighbour-joining phylogenetic tree was constructed using the MEGA software package. The nematode *A. ceylanium* was chosen as outgroup. The numbers indicated at each branch node is the bootstrap support value based on 1000 bootstrap replications.
