# Supplementary material
Source: PubMed Central journal article supplement (PMC1635345)
Supplement: mbc_E06-01-0035_2.pdf [file mbc_E06-01-0035_2.pdf]

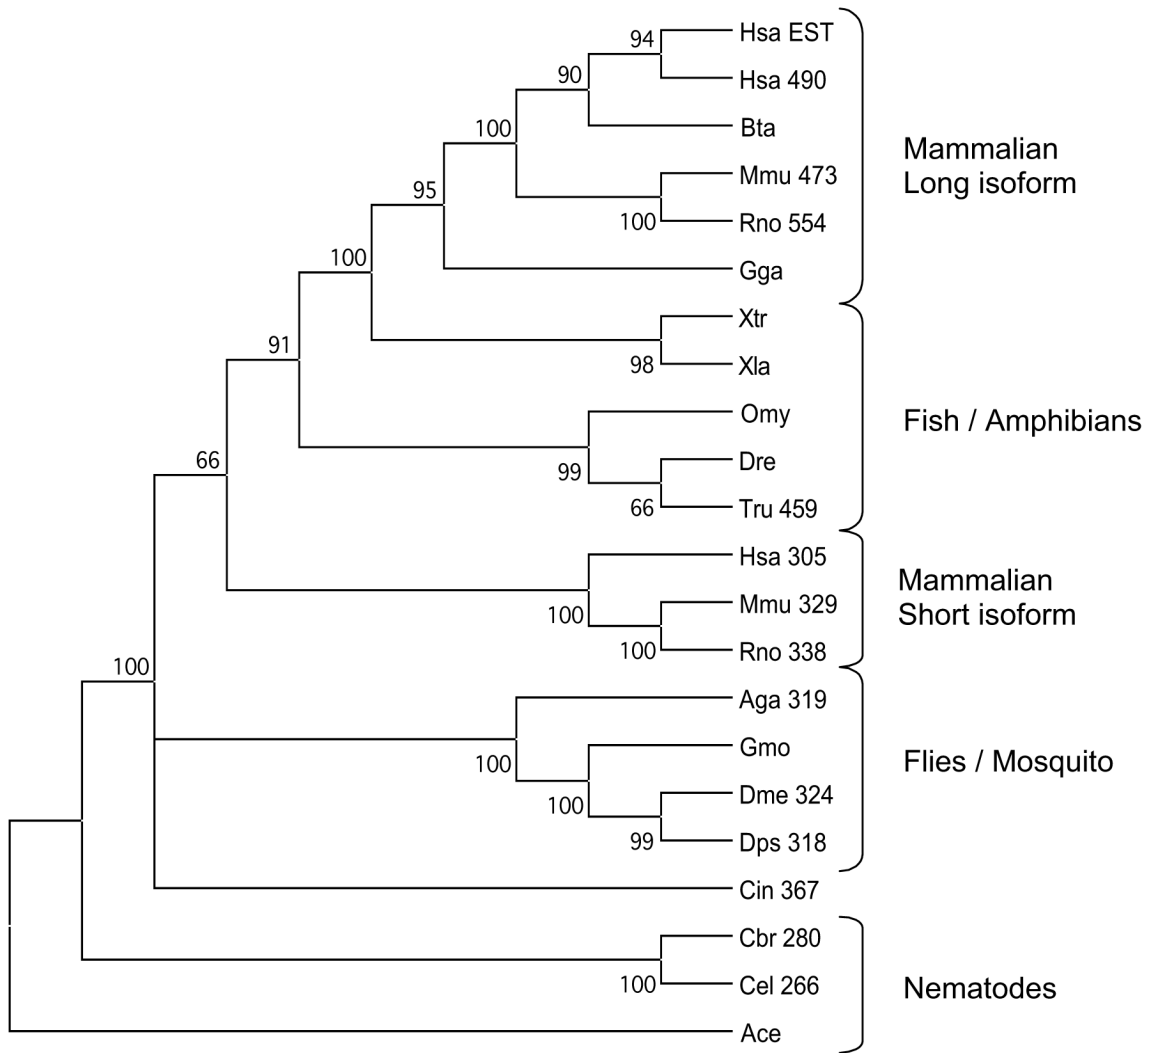

## Methods

**Alignments:** The sequences used for phylogenetic analysis were aligned using CLUSTALX v. 1.82. The protein alignments were conducted with the Gonnet matrix.

**Construction of the phylogenetic trees:** Rooted neighbour-joining phylogenetic tree was constructed using the MEGA software package. The nematode *A. ceylanium* was chosen as outgroup. The numbers indicated at each branch node is the bootstrap support value based on 1000 bootstrap replications.
