# Supplementary material
Source: PubMed Central journal article supplement (PMC1635345)

Antibody staining of dissected intestines from animals expressing an alpha-mannosidase::GFP fusion. Significant overlap between the staining patterns of  $\alpha$ -GRASP55 and  $\alpha$ -GFP antibodies is seen. We conclude that the  $\alpha$ -GRASP55 antibody recognises a Golgi localised protein, presumably the worm GRASP55 homolog, Y42H9AR.1. Scalebar 5  $\mu$ m.

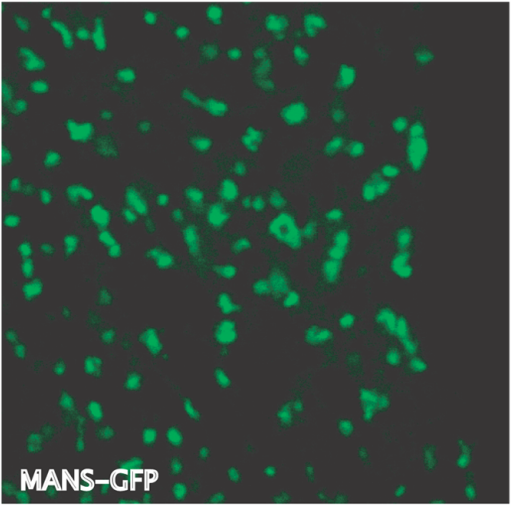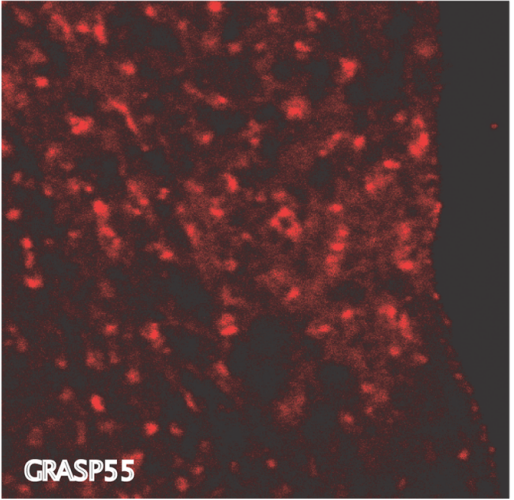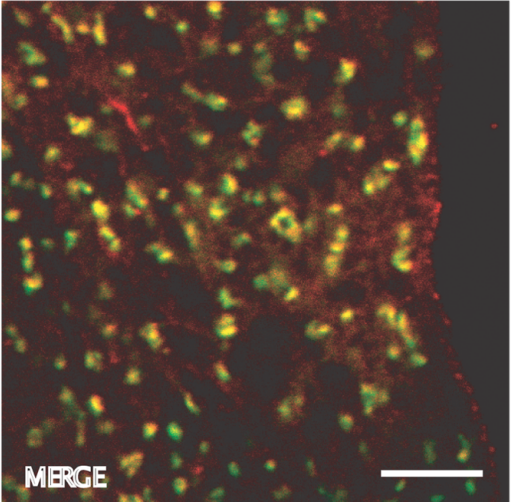

Supplement: mbc_E06-01-0035_3.pdf [file mbc_E06-01-0035_3.pdf]
