# Supplementary material
Source: PubMed Central journal article supplement (PMC1635345)

Confocal micrographs showing GFP fluorescence in animals carrying the wtMAA-1::GFP fusion reporter in the anterior intestinal cells. The arrow indicates an endosome stained by MAA-1::GFP in the hypodermis which has a distinct tubulated appearance. Insert shows the GFP signal obtained from wild-type worms using identical microscope settings. Scale bars: 5  $\mu\text{m}$ .

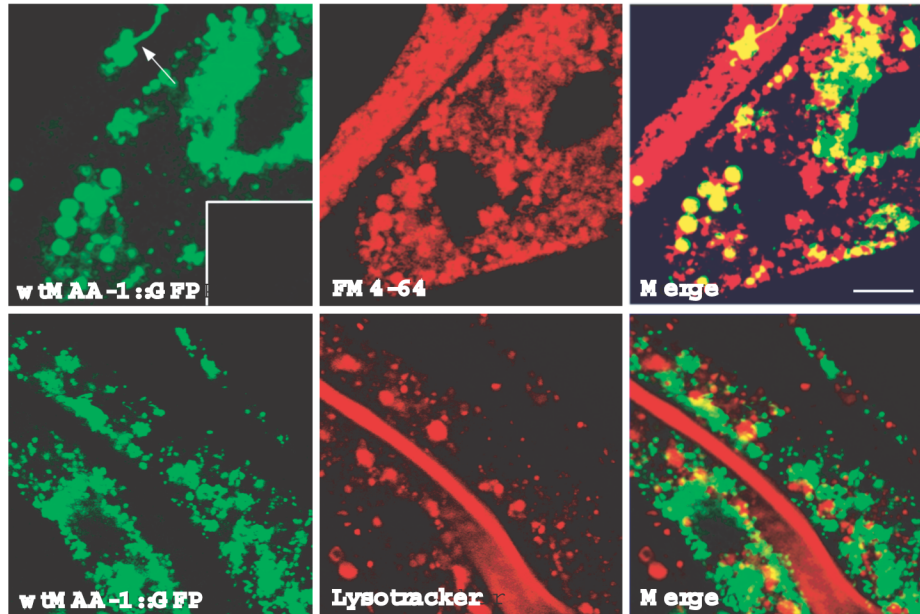

Supplement: mbc_E06-01-0035_4.pdf [file mbc_E06-01-0035_4.pdf]
